# Supplementary material for: Analysis of Intratumoral Heterogeneity in Myelodysplastic Syndromes with Isolated del(5q) Using a Single Cell Approach
Source: Cancers (Basel). 2021 Feb 17;13(4):841. doi: 10.3390/cancers13040841 (PMC7922695; doi:10.3390/cancers13040841)
Supplement: Supplementary file 1 [file cancers-13-00841-s001.pdf]

## Supplementary Materials:

# Analysis of Intratumoral Heterogeneity in Myelodysplastic Syndromes with Isolated del(5q) Using a Single Cell Approach

Pamela Acha, Laura Palomo, Francisco Fuster-Tormo, Blanca Xicoy, Mar Mallo, Ana Manzanares, Javier Grau, Silvia Marcé, Isabel Granada, Marta Rodríguez-Luaces, María Díez-Campelo, Lurdes Zamora and Francesc Solé

## Supplementary Methods

### *Fluorescence activated cell sorting of CD34<sup>+</sup>CD117<sup>+</sup>CD45<sup>+</sup>CD19<sup>-</sup> HSPC*

Bone marrow samples from each patient were used to isolate CD34<sup>+</sup>CD117<sup>+</sup>CD45<sup>+</sup>CD19<sup>-</sup> HSPC using fluorescence activated cell sorting (FACS). Staining was performed using CD34, CD117, CD45 and CD19 antibodies (BD Biosciences, San José, CA, USA). After 15 minutes incubation, cells were washed once with phosphate-buffered saline (PBS) and finally suspended in PBS at a final concentration of  $10 \times 10^6$  cells/mL (minimum volume of 1 mL).

Once sorting was performed using a FACSARIA™ II (BD Biosciences), cells were cryopreserved (20% DMSO, 70% FBS). At least 3 cryovials of 30.000 cells/100µL were stored for further SC experiments.

### *WES analysis*

Sequencing reads were mapped to the human reference genome (hg19/GRCh37) using GEM software [1]. Somatic variant calling was performed using MuTect, Strelka2 and Lancet [2–4], from data of both BM tumoral samples and paired T-CD3<sup>+</sup> lymphocytes germline control samples. Variant candidates were obtained and then annotated using population databases (dbSNP, ExAC, Exome Variant Server y 1000 Genomes), clinical databases (COSMIC, ClinVar) and in silico algorithms (SIFT, PolyPhen2, Mutation Assessor, Mutation Taster).

Variants located in highly variable regions or with low coverage were discarded. Then, variants were filtered according to the variant allele frequency (VAF): variants with VAF >5% were considered, as well as variants with VAF ≤5% and at least 25 altered reads for those variants that have been previously reported in hematological neoplasms.

Four to six candidate mutations, with the previously mentioned criteria, were selected per patient for subsequent SC analysis.

### *SNP-A analysis*

Data were analyzed using the Chromosome Analysis Suite version 3.0.0.42 (Thermo Fisher Scientific), using annotations of genome version NCBLv33.1 (hg 19). Paired sample analysis with T-CD3<sup>+</sup> lymphocytes DNA was used to rule out germline lesions. Software-reported copy number alterations of 50 Kb that carried a minimum of 10 aberrant probes were considered. A visual analysis was also performed.

For copy number neutral-loss of heterozygosity (CNN-LOH), ≥50 altered probe sets were required and at least 2 Mb and 25 Mb in size for telomeric and interstitial CNN-LOH, respectively.

### *SC capture*

For each studied patient, two types of cells were isolated using this protocol:

CD34<sup>+</sup>CD117<sup>+</sup>CD45<sup>+</sup>CD19<sup>-</sup> BM-HSPC from each studied moment (DX/PRE and available FU samples).

T-CD3<sup>+</sup> lymphocytes from a healthy donor. These cells served as wild type and normal copy number control.

Previously mentioned cells were thawed and then resuspended using suspension buffer (Hanks' Balanced Salt Solution [Gibco, 14175-053] supplemented with 1mM EDTA [Sigma-Aldrich, E6758] and 2% of fetal bovine serum [Gibco, 10270106]). Then, cells were incubated at 37°C for 20 minutes.

A volume of 15 µL at 1000 cells/µL was loaded into the corresponding Single-Cell Open App chip and loading program was run in Fluidigm C1 instrument. In this step, each cell is isolated in one of the 96 individual capture sites. Then, visual inspection using an optical microscope was performed in order to annotate capture sites containing only one cell and excluding, for further analysis, those having more than one cell or those empty capture sites.

Next steps in Fluidigm C1 are cell lysis and targeted DNA pre-amplification. Reaction mixes are loaded and reactions take place in each capture site. Cell lysis mix consists on 0.3 mg/mL of proteinase K (reference 19131, Qiagen, Hilden, Germany) and 0.01% of Tween 20 (reference P9416, Sigma Aldrich, Saint Louis, MI, USA) in HEPES buffer

(reference 51558, Sigma Aldrich). Incubation takes place for 50 minutes at 60°C, followed by 10 minutes at 98°C. Pre-amplification master mix is prepared with 32.5 µL of TaqMan™ PreAmp Master Mix 2X (Thermo Fisher Scientific) and 6.5 µL of a 1:100 primer mix dilution (0.18 µM of each mutation/CNA specific assay, see Supplementary Tables S2-S4). DNA denaturation takes place for 15 minutes at 95°C followed by 18 cycles of amplification: 25 seconds at 95°C followed by 4 minutes at 60°C.

Finally, pre-amplified DNA of each single cell is recovered and 1:5 diluted with DNA suspension buffer (reference 100-5319, Fluidigm). Dilutions are stored in 96 well-plates at -20°C.

## Supplementary Tables

**Table S1.** Genes with covered exons in the custom myeloid panel.

| Gene           | Exons    | Gene          | Exons     | Gene          | Exons | Gene         | Exons |
|----------------|----------|---------------|-----------|---------------|-------|--------------|-------|
| <i>ASXL1</i>   | 9, 11-12 | <i>DNMT3A</i> | All       | <i>KMT2A</i>  | 3-9   | <i>SF3B1</i> | 10-16 |
| <i>ASXL2</i>   | 11-12    | <i>EZH2</i>   | All       | <i>KRAS</i>   | 2-3   | <i>SMC3</i>  | All   |
| <i>BCOR</i>    | All      | <i>ETV6</i>   | All       | <i>MPL</i>    | All   | <i>SRSF2</i> | 1     |
| <i>BCORL1</i>  | All      | <i>FLT3</i>   | 13-15, 20 | <i>NF1</i>    | All   | <i>STAG1</i> | All   |
| <i>BRAF</i>    | 15       | <i>GATA1</i>  | All       | <i>NPM1</i>   | 10-11 | <i>STAG2</i> | All   |
| <i>CALR</i>    | 9        | <i>GATA2</i>  | All       | <i>NRAS</i>   | 2-3   | <i>TET2</i>  | All   |
| <i>CBL</i>     | 8,9      | <i>IDH1</i>   | All       | <i>PTPN11</i> | All   | <i>TP53</i>  | 3-11  |
| <i>CEBPA</i>   | All      | <i>IDH2</i>   | All       | <i>RAD21</i>  | All   | <i>U2AF1</i> | 2-6   |
| <i>CSF3R</i>   | All      | <i>JAK2</i>   | All       | <i>RUNX1</i>  | All   | <i>WT1</i>   | 2-10  |
| <i>CSNK1A1</i> | 3-4      | <i>KIT</i>    | 2,8-14,17 | <i>SETBP1</i> | 4     | <i>ZRSR2</i> | All   |

**Table S2.** Annotation of variants detected by WES and TDS in the studied samples.

| UP N | Gene     | Chr | Start position (hg19) | Reference allele | Alternate allele | dbSNP ID    | COSMIC ID   | Minor allele frequency (gnomAD) | SIFT Prediction | SIFT Score | Polyphen2 Prediction | Polyphen2 Score |
|------|----------|-----|-----------------------|------------------|------------------|-------------|-------------|---------------------------------|-----------------|------------|----------------------|-----------------|
| P1   | CUX1     | 7   | 101847749             | C                | T                | NA          | NA          | NA                              | NA              | NA         | NA                   | NA              |
| P1   | SETBP1   | 18  | 42531917              | T                | C                | rs267607038 | NA          | 1,76E-05                        | Deleterious     | 0.0        | Probably Damaging    | 1.0             |
| P1   | MAP7D2   | X   | 20134882              | T                | C                | NA          | NA          | NA                              | Tolerated       | 0.327      | Benign               | 0.075           |
| P1   | TENM1    | X   | 123615653             | C                | A                | NA          | NA          | NA                              | NA              | NA         | Probably Damaging    | 1.0             |
| P1   | LRTOMT   | 11  | 71819886              | G                | A                | rs963049398 | NA          | 1,84E-04                        | Tolerated       | 0.173      | Benign               | 0.006           |
| P1   | CCDC168  | 13  | 103389038             | T                | G                | NA          | NA          | NA                              | NA              | NA         | NA                   | NA              |
| P1   | TP53     | 17  | 7577094               | G                | A                | rs28934574  | COSM10704   | 8,79E-06                        | Deleterious     | 0.002      | Probably Damaging    | 1.0             |
| P1   | NUP93    | 16  | 56862936              | C                | A                | NA          | NA          | NA                              | Deleterious     | 0.001      | Probably Damaging    | 0.995           |
| P1   | UNC79    | 14  | 94158291              | T                | A                | NA          | NA          | NA                              | Deleterious     | 0.049      | NA                   | NA              |
| P2   | LRRC45   | 17  | 79988196              | A                | G                | NA          | NA          | NA                              | Deleterious     | 0.031      | Benign               | 0.361           |
| P2   | CRIPAK   | 4   | 1388324               | A                | C                | rs74377230  | COSM1427134 | NA                              | Deleterious     | 0.0        | NA                   | NA              |
| P2   | CACHD1   | 1   | 65113641              | G                | T                | rs746548532 | NA          | 8,80E-06                        | Deleterious     | 0.044      | NA                   | NA              |
| P2   | IL21R    | 16  | 27448835              | A                | G                | NA          | NA          | NA                              | Tolerated       | 0.068      | Benign               | 0.05            |
| P2   | SF3B1    | 2   | 198266834             | T                | C                | rs559063155 | COSM84677   | 0.0001161                       | Deleterious     | 0.004      | Probably Damaging    | 1.0             |
| P2   | YLPM1    | 14  | 75266087              | C                | T                | NA          | NA          | NA                              | NA              | NA         | NA                   | NA              |
| P3   | CGNL1    | 15  | 57836776              | C                | A                | NA          | NA          | NA                              | Deleterious     | 0.001      | Probably Damaging    | 0.992           |
| P3   | IBSP     | 4   | 88727321              | G                | T                | NA          | NA          | NA                              | Deleterious     | 0.03       | Probably Damaging    | 0.999           |
| P3   | SLC22A12 | 11  | 64359260              | C                | T                | NA          | NA          | NA                              | NA              | NA         | Possibly Damaging    | 1.0             |
| P3   | TRIM24   | 7   | 138145556             | A                | G                | NA          | NA          | NA                              | Tolerated       | 0.146      | Probably Damaging    | 0.987           |
| P3   | SETD2    | 3   | 47103749              | T                | C                | NA          | NA          | NA                              | Deleterious     | 0.002      | Possibly Damaging    | 0.799           |
| P3   | FAT1     | 4   | 187629475             | C                | T                | rs765412973 | NA          | 3,27E-05                        | Tolerated       | 0.136      | Possibly Damaging    | 0.644           |
| P3   | TCHH     | 1   | 152081923             | T                | C                | rs375240460 | NA          | 8,87E-06                        | Tolerated       | 0.288      | Benign               | 0.107           |
| P3   | PPM1D    | 17  | 58740529              | C                | A                | rs146477590 | COSM98068   | 5,44E-05                        | NA              | NA         | NA                   | NA              |
| P3   | SS18L1   | 20  | 60738552              | A                | G                | NA          | NA          | NA                              | Deleterious     | 0.004      | Benign               | 0.278           |
| P4   | TP53     | 17  | 7578530               | A                | G                | rs267605077 | COSM44654   | NA                              | Deleterious     | 0.002      | Possibly Damaging    | 0.994           |
| P4   | SCUBE1   | 22  | 43614452              | G                | A                | rs762401550 | NA          | 5,44E-05                        | Tolerated       | 0.25       | Benign               | 0.0             |
| P4   | BMP7     | 20  | 55758828              | C                | T                | rs749169949 | NA          | 1,63E-04                        | Deleterious     | 0.027      | Probably Damaging    | 1.0             |
| P4   | NUP85    | 17  | 73221814              | G                | C                | NA          | NA          | NA                              | Deleterious     | 0.03       | Possibly Damaging    | 0.723           |
| P4   | DNMT3B   | 20  | 31388640              | G                | T                | NA          | NA          | NA                              | NA              | NA         | NA                   | NA              |

Abbreviations: chr: chromosome; NA: not available; TDS: targeted deep sequencing; UPN: unique patient number; WES: whole exome sequencing. Information was gathered using myvariant.info [5].

**Table S3.** Associated biological process and molecular function of the genes in which variants were detected using WES and TDS.

| UPN | Gene            | Biological process                                                                                                                                                                        | Molecular function                                                                                      |
|-----|-----------------|-------------------------------------------------------------------------------------------------------------------------------------------------------------------------------------------|---------------------------------------------------------------------------------------------------------|
| P1  | <i>CUX1</i>     | Negative regulation of transcription by RNA polymerase II                                                                                                                                 | RNA polymerase II transcription regulatory region sequence-specific DNA binding                         |
| P1  | <i>SETBP1</i>   | NA                                                                                                                                                                                        | DNA binding, protein binding                                                                            |
| P1  | <i>MAP7D2</i>   | Microtubule cytoskeleton organization                                                                                                                                                     | NA                                                                                                      |
| P1  | <i>TENM1</i>    | Regulation of transcription by RNA polymerase III                                                                                                                                         | Protein heterodimerization activity, cell adhesion molecule binding.                                    |
| P1  | <i>LRTOMT</i>   | Methylation, developmental process                                                                                                                                                        | O-methyltransferase activity                                                                            |
| P1  | <i>CCDC168</i>  | NA                                                                                                                                                                                        | NA                                                                                                      |
| P1  | <i>TP53</i>     | Regulation of intrinsic apoptotic signaling pathway by p53 class mediator                                                                                                                 | Transcription regulatory region sequence-specific DNA binding, MDM2/MDM4 family protein binding         |
| P1  | <i>NUP93</i>    | Regulation of glycolytic process, SMAD protein signal transduction, regulation of gene silencing by miRNA                                                                                 | Protein binding, structural constituent of nuclear pore                                                 |
| P1  | <i>UNC79</i>    | Ion transmembrane transport                                                                                                                                                               | NA                                                                                                      |
| P2  | <i>LRRC45</i>   | NA                                                                                                                                                                                        | Protein binding                                                                                         |
| P2  | <i>CRIPAK</i>   | NA                                                                                                                                                                                        | NA                                                                                                      |
| P2  | <i>CACHD1</i>   | Calcium ion transmembrane transport                                                                                                                                                       | Voltage-gated calcium channel activity                                                                  |
| P2  | <i>IL21R</i>    | Natural killer cell activation, interleukin-21-mediated signaling pathway                                                                                                                 | Interleukin-21 receptor activity, transmembrane signaling receptor activity, cytokine receptor activity |
| P2  | <i>SF3B1</i>    | Spliceosomal complex assembly, positive regulation of gene expression                                                                                                                     | RNA binding                                                                                             |
| P2  | <i>YLPM1</i>    | Regulation of telomere maintenance                                                                                                                                                        | RNA binding                                                                                             |
| P3  | <i>CGNL1</i>    | Negative regulation of small GTPase mediated signal transduction                                                                                                                          | Motor activity;protein binding                                                                          |
| P3  | <i>IBSP</i>     | Osteoblast differentiation, cell adhesión                                                                                                                                                 | Integrin binding                                                                                        |
| P3  | <i>SLC22A12</i> | Organic anion transport                                                                                                                                                                   | Urate transmembrane transporter activity, urate transmembrane transporter activity, PDZ domain binding  |
| P3  | <i>TRIM24</i>   | Negative regulation of cell population proliferation, protein ubiquitination.                                                                                                             | p53 binding, chromatin binding                                                                          |
| P3  | <i>SETD2</i>    | Angiogenesis, transcription elongation from RNA polymerase II promoter                                                                                                                    | Histone-lysine N-methyltransferase activity                                                             |
| P3  | <i>FAT1</i>     | Actin filament organization, cell adhesion                                                                                                                                                | Calcium ion binding                                                                                     |
| P3  | <i>TCHH</i>     | Intermediate filament organization                                                                                                                                                        | Calcium ion binding                                                                                     |
| P3  | <i>PPM1D</i>    | Negative regulation of cell proliferation, DNA damage response, signal transduction by p53 class mediator                                                                                 | Protein serine/threonine kinase activity                                                                |
| P3  | <i>SS18L1</i>   | Chromatin organization, positive regulation of transcription by RNA polymerase II                                                                                                         | Transcription coactivator activity                                                                      |
| P4  | <i>TP53</i>     | Regulation of intrinsic apoptotic signaling pathway by p53 class mediator                                                                                                                 | Transcription regulatory region sequence-specific DNA binding, MDM2/MDM4 family protein binding         |
| P4  | <i>SCUBE1</i>   | Inflammatory response, endothelial cell differentiation                                                                                                                                   | Calcium ion binding                                                                                     |
| P4  | <i>BMP7</i>     | Skeletal system development, epithelial to mesenchymal transition, BMP signaling pathway, epithelial cell differentiation, negative regulation of NF-kappaB transcription factor activity | Cytokine activity, growth factor activity, BMP receptor binding                                         |
| P4  | <i>NUP85</i>    | Regulation of glycolytic process                                                                                                                                                          | Structural constituent of nuclear pore                                                                  |
| P4  | <i>DNMT3B</i>   | Negative regulation of transcription by RNA polymerase II, response to hypoxia, DNA methylation                                                                                           | DNA-methyltransferase activity, histone deacetylase binding                                             |

Abbreviations: NA: not available; TDS: targeted deep sequencing; UPN: unique patient number; WES: whole exome sequencing. Information was gathered using mygene.info [5].

**Table S4.** CNA detected in each patient using SNP-A analysis.

| UPN | Chr | Cytoband |        | Coordinates |           | Copy number | Alteration | Size (Mb) |
|-----|-----|----------|--------|-------------|-----------|-------------|------------|-----------|
|     |     | Start    | End    | Start       | End       |             |            |           |
| P1  | 5   | q14.3    | q34    | 89575437    | 163450743 | 1           | Loss       | 73.88     |
| P2  | 5   | q21.2    | q34    | 102986653   | 162755919 | 1           | Loss       | 59.77     |
|     | X   | p22.31   | p22.31 | 6449753     | 8135644   | 1           | Loss       | 1.67      |
| P3  | 5   | q14.3    | q34    | 86255729    | 166126310 | 1           | Loss       | 79.87     |
| P4  | 5   | q21.3    | q34    | 107937392   | 165840296 | 1           | Loss       | 57.90     |

Abbreviations: Chr: chromosome; Mb: megabases; UPN: UPN: unique patient number; SNP-A: single nucleotide polymorphism arrays

**Table S5.** Specific primers and assays designed for selected SNV for each patient included in the study.

| UPN | Gene            | Mutation     | Forward primer             | Reverse primer                 | Mutant Reporter (FAM-NFQ) | Wild-type Reporter (VIC-NFQ) |
|-----|-----------------|--------------|----------------------------|--------------------------------|---------------------------|------------------------------|
| P1  | <i>NUP93</i>    | p.Ala158Asp  | ACCCTTGACTGTCTTTGGAAATT    | TCAGGAACTTCGAACCAATTGGTAA      | CCAGCTGGTCCTGATG          | CAGCTGGGCTGATG               |
|     | <i>TP53</i>     | p.Arg150Trp  | CTTCTTGCGGAGATTCTCTTCCT    | GCTTGAGGTGCGTGTGTTG            | TGCGCCAGTCTCT             | TGCGCCGGTCTCT                |
|     | <i>LRTOMT</i>   | p.Arg224His  | CCGCTTCTTGCAAGTATGCTAAG    | GATGGCAGGGAAGTCTGGAA           | CGCTACCACTGCCG            | CGCTACCGCTGCCG               |
|     | <i>SETBP1</i>   | p.Ile871Thr  | TCCCACAGTGAGGAGACGAT       | CTTGGTCAGAAGTGCTGTTGTTG        | CTGTCCCAGTGCCGC           | TCTGTCCCAATGCCGC             |
|     | <i>CUX1</i>     | p.Arg1007*   | CGAAGCCATGGAGCAAGCT        | CAGAGCTGCATCCGGATGA            | AGGGTTCTCAGCCTTT          | AGGGTTCTCGGCCTTT             |
| P2  | <i>SF3B1</i>    | p.Lys700Glu  | TGGCCAAAGCACTGATGGT        | TGGTTTTGTAGGTCTTGTGGATGAG      | AGCAGGAAGTTCG             | CAGCAGAAAGTTCG               |
|     | <i>YLMP1</i>    | p.Arg1363*   | GGAGAGAAGAAAGAAATCGAGAGCAT | TCGAATCCTCAACTCACCCCTAT        | ACGGAAATCTCAATCATA        | CACGGAAATCTCGATCATA          |
|     | <i>CACHD1</i>   | p.Arg387Ser  | CATGATGGTGCTGAATCAGTTGAG   | ATCCGGTTGGGAAGGTTTGT           | TGGGCAGTTTCTAC            | TGGGCAGGTTCTAC               |
| P3  | <i>PPM1D</i>    | p.Cys478*    | CCCTCAAAAGATCCAGAACCCTTG   | CCAATTGGAAGGCTATTATTCAAAAGATCA | CTTTAGCTCAATTTTC          | TTAGCGCAATTTTC               |
|     | <i>SETD2</i>    | p.Asp2066Gly | GGAGCTTCTTCGTTTCCTTTTCTCT  | CCCGAAGACTCCTAATAGGTCAAG       | CCCAGGCAAGCAA             | AGACCCAGACAAGCAA             |
|     | <i>SS18L1</i>   | p.Ser202Gly  | GTCGTTCACTCTCCATGATGCA     | CGACTGGCCCTGGTAGTG             | CGCACTACGGCTCG            | TCGCACTACAGCTCG              |
|     | <i>FAT1</i>     | p.Ala503Thr  | CAATCGCAAACGGCACATGAT      | GTGAGAACGGGTACGTGACAT          | ACAGTATCACAAATT           | CAGTATCGCAAATT               |
|     | <i>SLC22A12</i> | p.Pro78Ser   | TGAGGCCCTCCTGGCTATTT       | GAAGCGGCGGCACTG                | CCCGGCGAGATGG             | CCCGGCGGGATGG                |
|     | <i>TRIM24</i>   | p.Tyr88Cys   | CCCTGCCTGCACTCTTCTG        | GGCCGAGCCCAGCAT                | CAGCGCTGCCTCAT            | CCAGCGCTACCTCAT              |
| P4  | <i>TP53</i>     | p.Phe95Leu   | GTGGAATCAACCCACAGC         | AACTCTGTCTCCTTCCTCTTC          | AGATGCTTTGCC              | CAAGATGTTTGGCA               |
|     | <i>NUP85</i>    | p.Ala293Pro  | AGAGTTCAGCACAAATGTCTCT     | GTACAAGAGCCGAGTCACT            | AAGCTCCCTTG               | AAGCTGCCTTG                  |
|     | <i>BMP7</i>     | p.Arg303His  | CTAAGCATACCTGCCACG         | TCCACTTCCGCAGCAT               | TGGAGTGGTTC               | TGGAGCGGTTC                  |

Patient P1, P2 and P3 assays are from TaqMan (Thermo Fisher Scientific) while P4 assay are LNA prime time probes (Integrated DNA Technologies). Abbreviations: SNV: single nucleotide variant. UPN: unique patient number

**Table S6.** Pre-designed TaqMan CNA.

| UPN               | Gene Symbol  | Chromosome | Cytogenetic band | Assay ID      | Context sequence           |
|-------------------|--------------|------------|------------------|---------------|----------------------------|
| Reference CNA     | <i>B2M</i>   | 15         | 15q21.1          | Hs00119644_cn | TGTTTTTGTTCCTGAGGA         |
|                   |              |            |                  | Hs03900880_cn | CCAGAGCAAAGTGGGCGGCATGGGC  |
|                   |              |            |                  | Hs04450638_cn | TGATTGCCTCTGAAGGTCTATTTTC  |
| P1, P2, P3 and P4 | <i>RPS14</i> | 5          | 5q33.1           | Hs03575527_cn | CGCCACAGGAGAGAAGCCCAAAGTT  |
|                   |              |            |                  | Hs06120504_cn | CTTCCAGAAAGGGAAACAGGCTGA   |
|                   |              |            |                  | Hs03542482_cn | TTCTTACCTGGACAAAACAGCATTT  |
| P2                | <i>STS</i>   | X          | Xp22.31          | Hs05600643_cn | GGCTACTTTGCAGACGGGGAAGCTG  |
|                   |              |            |                  | Hs05690005_cn | GCTTCTGTGTGCTCCTCGGATGCAGC |
|                   |              |            |                  | Hs05669475_cn | TGCATGGAAGTGCTCACCTGATTCA  |

Abbreviations: CNA: copy number assay. UPN: unique patient number.

**Table S7.** Reference genotyping assay, used in all tested samples.

| Assay name                | rs346172                      | Location                     | Intronic variant | Chromosome                 | 19 | Position | 13843233 |
|---------------------------|-------------------------------|------------------------------|------------------|----------------------------|----|----------|----------|
| Forward Primer            | Reverse Primer                | Wild-type Reporter (VIC-NFQ) |                  | Variant Reporter (FAM-NFQ) |    |          |          |
| CAAACGCCATCCGGACCA-<br>TA | GCATCTTT-<br>GAGCTCCTAAGTCCAA | CACTATCGCCATCACTTT           |                  | ACTATCGCCGTCACCTTT         |    |          |          |

**Table S8.** PCR cycling conditions in the BioMark HD.

| Stage                     | Temperature | Time       |
|---------------------------|-------------|------------|
| Thermal Phase             | 70°C        | 40 minutes |
|                           | 60°C        | 30 seconds |
| Hot start phase           | 98°C        | 1 minute   |
| Amplification (35 cycles) | 97°C        | 20 seconds |
|                           | 60°C        | 20 seconds |

## References

1. Marco-Sola, S.; Sammeth, M.; Guigó, R.; Ribeca, P. The GEM Mapper: Fast, Accurate and Versatile Alignment by Filtration. *Nat. Methods* **2012**, *9*, 1185–1188, doi:10.1038/nmeth.2221.
2. Cibulskis, K.; Lawrence, M.S.; Carter, S.L.; Sivachenko, A.; Jaffe, D.; Sougnez, C.; Gabriel, S.; Meyerson, M.; Lander, E.S.; Getz, G. Sensitive Detection of Somatic Point Mutations in Impure and Heterogeneous Cancer Samples. *Nat. Biotechnol.* **2013**, *31*, 213–219, doi:10.1038/nbt.2514.
3. Kim, S.; Scheffler, K.; Halpern, A.L.; Bekritsky, M.A.; Noh, E.; Källberg, M.; Chen, X.; Kim, Y.; Beyter, D.; Krusche, P.; et al. Strelka2: Fast and Accurate Calling of Germline and Somatic Variants. *Nat. Methods* **2018**, *15*, 591–594, doi:10.1038/s41592-018-0051-x.
4. Narzisi, G.; Corvelo, A.; Arora, K.; Bergmann, E.A.; Shah, M.; Musunuri, R.; Emde, A.-K.; Robine, N.; Vacic, V.; Zody, M.C. Genome-Wide Somatic Variant Calling Using Localized Colored de Bruijn Graphs. *Commun. Biol.* **2018**, *1*, 20, doi:10.1038/s42003-018-0023-9.
5. Xin J, Mark A, Afrasiabi C, Tsueng G, Juchler M, Gopal N, Stupp GS, Putman TE, Ainscough BJ, Griffith OL, et al. High-performance web services for querying gene and variant annotation. *Genome Biology*. **2016**, *17*(1), 1-7, doi: 10.1186/s13059-016-0953-9.
